# Supplementary material for: Widening of Socioeconomic Inequalities in U.S. Death Rates, 1993–2001
Source: PLoS One. 2008 May 14;3(5):e2181. doi: 10.1371/journal.pone.0002181 (PMC2367434; doi:10.1371/journal.pone.0002181)
Supplement: Table S1 — International Classification of Diseases (ICD) codes for major causes of death according to the Tenth and Ninth Revisions (0.03 MB XLS) [file pone.0002181.s001.xls]

## Sheet: Appendix
Table S1: International Classification of Diseases (ICD) codes for major causes of death
according to the Tenth and Ninth Revisions
Causes of Death	ICD-10	ICD-9
All Causes	A01-Y89	001-999
Cancer	C00-C97	140-208
Heart Diseases	I00-I09, I11, I13, I20-I51	390-398, 402, 404, 410-429
Accidents (unintentional injuries)	V01-X59, Y85-Y86	E800-E869, E880-E929
Stroke	I60-I69	430-434, 436-438
Diabetes	E10-E14	250
COPD	J40-J47	490-494, 496
HIV disease	B20-B24	042-044
Suicide (intentional self-harm)	X60-X84, Y87.0	E950-E959
Homicide and legal intervention	X85-Y09, Y87.1, Y35, Y89.0	E960-E969, E970-E978
Septicemia	A40-A41	038
Nephritis	N00-N07, N17-N19, N25-N27	580-589
Influenza & Pneumonia	J10-J18	480-487
Chronic Liver Disease and Cirhosis	K70, K73-K74	571
Viral Hepatitis	B15-B19	070
Hypertension	I10-I12	401, 403
