# Supplementary material for: Widening of Socioeconomic Inequalities in U.S. Death Rates, 1993–2001
Source: PLoS One. 2008 May 14;3(5):e2181. doi: 10.1371/journal.pone.0002181 (PMC2367434; doi:10.1371/journal.pone.0002181)
Supplement: Table S2 — Trends in age-standardized death rates (per 100,000) for selected causes of death with decreasing trend in the general populationamong 25–64 year old U.S. adults by race, sex, and education, 1993–2001 (0.04 MB XLS) [file pone.0002181.s002.xls]

## Sheet: Tables 2
Table S2. Trends in age-standardized death rates (per 100,000) for selected causes of death with decreasing trend in the general population
among 25-64 year old U.S. adults by race, sex, and education, 1993-2001
			Whites									Blacks
		1993			2001			Changes in Rates			1993			2001			Change in Rate
Causes	Race/Education in yrs	Number	Rate		Number	2001		Total %*	Annual %†		Number	Rate		Number	2001		Total %*	Annual %†
Cancer	Men All	52692	127.855		53841	110.215		-13.7969	-1.9‡		9700	221.078		10101	173.495		-21.5232	-2.7 ‡
	Men < 12 Yrs	12424	195.266		9752	208.347		6.69876	0.8		4219	256.024		3314	246.835		-3.58903	0.1
	Men 12 Yrs	21901	156.489		22971	152.203		-2.73907	-0.5		3853	272.462		4596	226.6		-16.8322	-1.8 ‡
	Men 13-15 Yrs	8600	97.087		10248	82.3643		-15.1644	-1.9		1022	137.765		1386	102.172		-25.8361	-3.3‡
	Men 16+ Yrs	9767	85.5821		10870	66.4466		-22.3593	-3.1‡		606	125.004		805	85.2201		-31.826	-5.1‡
	P value trend								<0.001									<0.001
	Women All	47895	111.861		49448	98.0089		-12.3835	-1.7‡		8104	145.134		9365	132.086		-8.99055	-1.1‡
	Women < 12 Yrs	8757	142.044		6709	157.656		10.9905	1.1‡		2451	146.405		1958	130.729		-10.7075	-0.3
	Women 12 Yrs	23205	128.511		22867	123.26		-4.08625	-0.8‡		3451	177.61		4141	173.664		-2.22192	-1.1
	Women 13-15 Yrs	8769	88.2515		10393	74.0618		-16.0787	-1.8‡		1358	112.705		1959	100.821		-10.5445	-0.6
	Women 16+ Yrs	7164	87.5846		9479	72.4868		-17.2379	-2.7‡		844	131.039		1307	113.144		-13.6564	-2.6 ‡
	P value trend								0.02									0.17
Heart Diseases	Men All	52977	129.303		49044	100.659		-22.1527	-3.2‡		10993	245.82		11602	194.911		-20.7102	-2.7‡
	Men < 12 Yrs	13673	228.794		9599	214.898		-6.07351	-0.6		4496	281.662		3374	262.914		-6.65634	-0.2
	Men 12 Yrs	22654	163.903		21795	145.214		-11.4023	-1.9‡		4513	305.56		5522	258.21		-15.496	-2.0 ‡
	Men 13-15 Yrs	8433	95.0005		9226	73.1469		-23.0037	-3.3‡		1291	161.509		1756	120.037		-25.6781	-3.4‡
	Men 16+ Yrs	8217	72.322		8424	51.1249		-29.3093	-4.2‡		693	139.29		950	99.2155		-28.7705	-5.1‡
	P value trend								0.002									<0.001
	Women All	19608	44.8255		19195	37.9155		-15.4153	-2.1‡		6849	122.002		7520	106.057		-13.0698	-1.8‡
	Women < 12 Yrs	5550	84.4239		4166	97.8202		15.868	1.8‡		2597	151.42		1996	132.885		-12.2414	-0.4
	Women 12 Yrs	9758	52.4899		9350	50.0837		-4.58408	-0.8‡		2906	149.049		3395	142.087		-4.67136	-1.4
	Women 13-15 Yrs	2719	27.4814		3506	25.1196		-8.59392	-0.8		893	76.2581		1404	73.0284		-4.23525	-0.3
	Women 16+ Yrs	1581	20.0303		2173	16.9447		-15.4046	-2.9‡		453	73.1351		725	62.7551		-14.1929	-2.9 ‡
	P value trend								0.15									0.55
Table S2. Trends in age-standardized death rates (per 100,000) for selected causes of death with decreasing trend in the general population
among 25-64 year old U.S. adults by race, sex, and education, 1993-2001 (cont.)
			Whites									Blacks
		1993			2001			Change in Rate			1993			2001			Change in Rate
Causes	Race/Education in yrs	Number	Rate		Number	2001		Total %*	Annual %†		Number	Rate		Number	2001		Total %*	Annual %†
Stroke	Men All	4970	12.0154		5014	10.3284		-14.0401	-1.9‡		1971	44.1243		2207	37.2383		-15.6059	-2.8‡
	Men < 12 Yrs	1310	22.4175		1073	23.8642		6.45344	1		863	55.3441		716	55.7835		0.793908	-0.4
	Men 12 Yrs	2134	15.233		2245	14.9016		-2.17547	-0.7		799	53.8551		1011	47.21		-12.3388	-2.2
	Men 13-15 Yrs	786	8.80142		883	7.04745		-19.9283	-2.5‡		200	24.4961		302	21.1402		-13.6999	-2
	Men 16+ Yrs	740	6.46767		813	4.97102		-23.1404	-3.1‡		109	21.4211		178	18.757		-12.4366	-2.4‡
	P value trend								0.01									0.11
	Women All	4270	9.87974		4309	8.58422		-13.1129	-1.8‡		1714	30.2343		1991	27.9908		-7.4204	-1.4‡
	Women < 12 Yrs	953	15.944		805	19.1624		20.186	1.8‡		574	34.374		517	35.412		3.0197	0.4
	Women 12 Yrs	2168	11.9272		2045	11.2414		-5.74973	-0.8		733	37.1311		900	37.5756		1.19722	-0.5
	Women 13-15 Yrs	678	6.73637		864	6.16626		-8.46315	-1		272	22.5526		390	20.1674		-10.5763	-1.6‡
	Women 16+ Yrs	471	5.88201		595	4.6089		-21.6442	-3.1‡		135	21.5311		184	15.6755		-27.196	-4.4‡
	P value trend								0.03									0.06
HIV	Men All	13701	31.2533		2866	6.27091		-79.9352	-23.0‡		6495	111.282		3712	56.1004		-49.5873	-12.1‡
	Men < 12 Yrs	1134	28.6928		488	15.4287		-46.228	-12.5‡		1527	123.077		1093	120.879		-1.78557	-3.1
	Men 12 Yrs	4857	32.25		1175	8.10634		-74.864	-20.5‡		2836	124.638		1815	66.5525		-46.6032	-11.7‡
	Men 13-15 Yrs	3622	30.6057		663	5.23994		-82.8792	-24.8‡		1277	86.5881		503	27.8115		-67.8807	-16.9‡
	Men 16+ Yrs	4088	31.3971		540	3.45484		-88.9963	-28.4‡		855	118.159		301	28.8619		-75.5737	-20.1‡
	P value trend								0.10									0.01
	Women All	854	1.91546		418	0.923777		-51.7725	-11.9‡		1610	23.0511		1682	21.7129		-5.80527	-4.6
	Women < 12 Yrs	198	5.66946		142	5.37205		-5.2458	-3.4		510	41.0346		564	52.9343		28.9992	0.6
	Women 12 Yrs	400	2.47658		201	1.43696		-41.9782	-10.2‡		795	30.118		827	30.4966		1.25695	-4.3
	Women 13-15 Yrs	169	1.29536		56	0.405218		-68.7177	-15.7‡		226	10.7446		212	8.61663		-19.8052	-6.6‡
	Women 16+ Yrs	87	0.803491		19	0.137183		-82.9266	-22.9‡		79	8.8701		79	5.86398		-33.8904	-10.7‡
	P value trend								0.6									0.004
*The difference between the 2001 and 1993 rate expressed as percentage of the 1993 rate.
†Annual percent change based on rates that were age-adjusted to the 2000 U.S. standard population using regression analysis.
‡Annual percent change is statistically significantly different from zero (two-sided P<.05).
